# Supplementary material
Source: PubMed Central journal article supplement (PMC10390919)
Supplement: jmcp.2021.27.3.296_s001.pdf [file jmcp.2021.27.3.296_s001.pdf]

## **SUPPLEMENTARY MATERIALS**

### **Statin use and mortality in rheumatoid arthritis: an incident user cohort study**

Anindit Chhibber, MS; Savannah Hansen, PharmD; and Joseph Biskupiak, PhD, MBA

#### **Supplementary Figure 1: Absolute Standardized Differences Before and After Yearly Propensity Score Matching**

#### **Supplementary Table 1: Baseline Characteristics of Participating RA Patients**

#### **Supplementary Table 2: Unadjusted and Adjusted Odds Ratios for Mortality Associated with Statin Use (Before Matching)**

#### **Supplementary Figure 2: Cumulative Hazard Estimates and Unadjusted Hazard Ratios for Mortality Associated with Statin Use (Before Matching)**

#### **Supplementary Table 3: Unadjusted and Adjusted Hazard Ratios for Mortality Associated with Statin Use in Unmatched Cohorts (Before Matching)**

# Supplementary Figure 1: Absolute Standardized Differences Before and After Yearly Propensity Score Matching

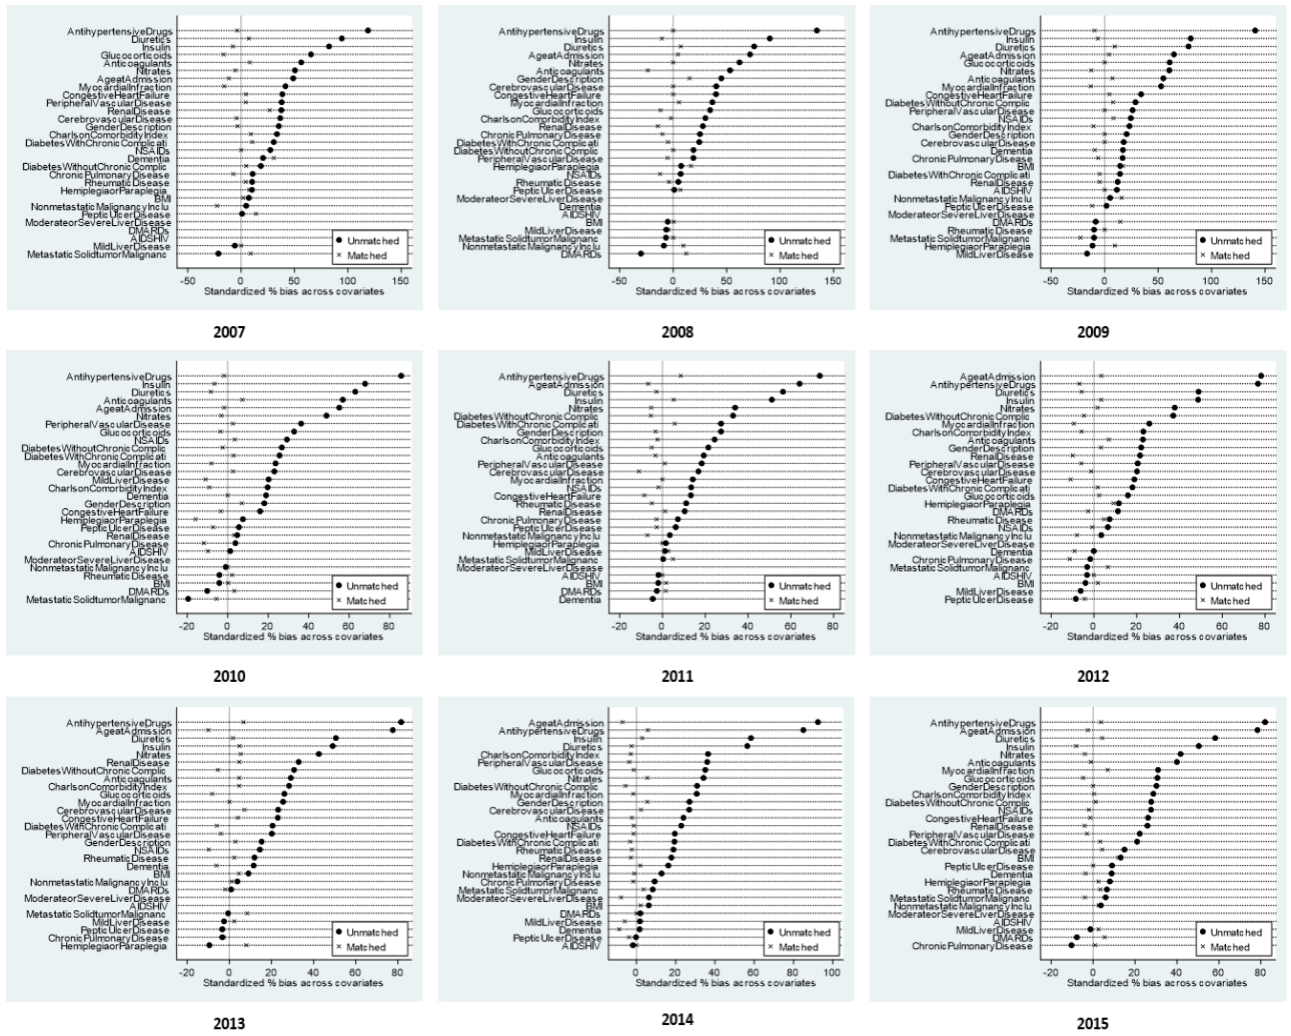

**Supplementary Table 1: Baseline Characteristics of Participating RA Patients**

| Baseline Characteristics          | Eligible Participants (N=19,614) |
|-----------------------------------|----------------------------------|
| <b>Age in Years (Mean ± SD)</b>   | 51.51 ± 15.02                    |
| <b>Gender (%)</b>                 |                                  |
| Female                            | 75.08                            |
| Male                              | 24.92                            |
| <b>BMI (Mean ± SD)</b>            | 25.55 ± 3.5                      |
| <b>Comorbidities (%)</b>          |                                  |
| AIDSHIV                           | 0.33                             |
| Nonmetastatic Malignancy          | 8.57                             |
| Cerebrovascular Disease           | 6.29                             |
| Chronic Pulmonary Disease         | 17.91                            |
| Congestive Heart Failure          | 4.30                             |
| Dementia                          | 0.62                             |
| Diabetes without Complications    | 6.71                             |
| Diabetes with Complications       | 3.68                             |
| Hemiplegia or Paraplegia          | 1.99                             |
| Metastatic Solid Tumor Malignancy | 3.07                             |
| Liver Disease                     | 9.63                             |
| Myocardial Infarction             | 2.17                             |
| Peptic Ulcer Disease              | 3.55                             |
| Peripheral vascular Disease       | 4.82                             |
| Renal Disease                     | 5.05                             |
| Rheumatic Disease                 | 17.64                            |
| <b>Medication Use (%)</b>         |                                  |
| Antihypertensive Drugs            | 17.90                            |
| Diuretics                         | 11.69                            |
| Glucocorticoids                   | 28.33                            |
| Anticoagulants                    | 5.99                             |
| Insulin                           | 7.34                             |
| Nitrates                          | 2.61                             |
| DMARDs                            | 4.66                             |
| NSAIDs                            | 28.41                            |

AIDS: acquired immunodeficiency syndrome; HIV: human immunodeficiency virus; DMARDs: disease-modifying antirheumatic drugs; NSAIDs: nonsteroidal anti-inflammatory drug

**Supplementary Table 2: Unadjusted and Adjusted Odds Ratios for Mortality Associated with Statin Use (Before Matching)**

| Variables                         | Unadjusted Regression |                |         | Adjusted Regression |               |         |
|-----------------------------------|-----------------------|----------------|---------|---------------------|---------------|---------|
|                                   | Odds Ratio            | 95% CI         | p Value | Odds Ratio          | 95% CI        | p Value |
| Age                               | 1.04                  | (1.03 – 1.04)  | <0.001  | 1.03                | (1.02 – 1.03) | <0.011  |
| Gender                            | 1.77                  | (1.44 – 2.19)  | <0.001  | 1.45                | (1.16 – 1.81) | 0.001   |
| BMI                               | 0.99                  | (0.98 – 1.00)  | 0.33    | 0.98                | (0.97 – 1.00) | 0.091   |
| AIDSHIV                           | 6.15                  | (2.79 – 13.57) | <0.001  | 3.70                | (1.55 – 8.83) | 0.003   |
| Nonmetastatic Malignancy          | 1.65                  | (1.23 – 2.23)  | 0.001   | 1.16                | (0.84 – 1.59) | 0.361   |
| Cerebrovascular Disease           | 1.61                  | (1.14 – 2.27)  | 0.007   | 0.79                | (0.53 – 1.17) | 0.246   |
| Chronic Pulmonary Disease         | 1.75                  | (1.39 – 2.20)  | <0.001  | 1.05                | (0.81 – 1.36) | 0.704   |
| Congestive Heart Failure          | 2.99                  | (2.16 – 4.13)  | <0.001  | 1.24                | (0.84 – 1.83) | 0.261   |
| Dementia                          | 2.16                  | (0.87 – 5.31)  | 0.094   | 0.84                | (0.33 – 2.14) | 0.717   |
| Diabetes without Complications    | 1.88                  | (1.37 – 2.58)  | <0.001  | 0.89                | (0.62 – 1.27) | 0.539   |
| Diabetes with Complications       | 2.36                  | (1.62 – 3.43)  | <0.001  | 1.04                | (0.67 – 1.61) | 0.853   |
| Hemiplegia or Paraplegia          | 1.61                  | (0.89 – 2.89)  | 0.108   | 0.86                | (0.45 – 1.62) | 0.648   |
| Metastatic Solid Tumor Malignancy | 5.07                  | (3.72 – 6.90)  | <0.001  | 3.15                | (2.25 – 4.43) | <0.001  |
| Liver Disease                     | 3.20                  | (2.52 – 4.06)  | <0.001  | 2.42                | (1.85 – 3.18) | <0.001  |
| Myocardial Infarction             | 2.69                  | (1.71 – 4.23)  | <0.001  | 0.94                | (0.56 – 1.57) | 0.822   |
| Peptic Ulcer Disease              | 1.67                  | (1.08 – 2.59)  | 0.020   | 0.88                | (0.55 – 1.40) | 0.593   |
| Peripheral vascular Disease       | 2.36                  | (1.69 – 3.29)  | <0.001  | 0.79                | (0.53 – 1.16) | 0.242   |
| Renal Disease                     | 2.24                  | (1.60 – 3.13)  | <0.001  | 0.89                | (0.60 – 1.33) | 0.599   |
| Rheumatic Disease                 | 2.09                  | (1.67 – 2.60)  | <0.001  | 1.40                | (1.11 – 1.78) | 0.005   |
| Antihypertensive Drugs            | 2.58                  | (2.09 – 3.19)  | <0.001  | 1.21                | (0.93 – 1.59) | 0.144   |
| Diuretics                         | 3.44                  | (2.76 – 4.30)  | <0.001  | 1.73                | (1.31 – 2.27) | <0.001  |
| Glucocorticoids                   | 1.62                  | (1.32 – 2.00)  | <0.001  | 1.15                | (0.92 – 1.45) | 0.207   |
| Anticoagulants                    | 2.41                  | (1.78 – 3.27)  | <0.001  | 1.26                | (0.90 – 1.76) | 0.171   |
| Insulin                           | 4.78                  | (3.79 – 6.05)  | <0.001  | 2.76                | (2.05 – 3.71) | <0.001  |
| Nitrates                          | 3.83                  | (2.66 – 5.51)  | <0.001  | 1.72                | (1.14 – 2.60) | 0.010   |
| DMARDs                            | 0.60                  | (0.32 – 1.09)  | 0.097   | 0.94                | (0.51 – 1.74) | 0.858   |
| NSAIDs                            | 0.88                  | (0.70 – 1.11)  | 0.314   | 0.78                | (0.61 – 1.00) | 0.051   |
| Statins                           | 1.70                  | (1.29 – 2.23)  | <0.001  | 0.71                | (0.52 – 0.98) | 0.038   |

Note: Adjusted for age, gender, BMI, comorbidities and medication use

**Supplementary Figure 2: Cumulative Hazard Estimates and Unadjusted Hazard Ratios for Mortality Associated with Statin Use (Before Matching)**

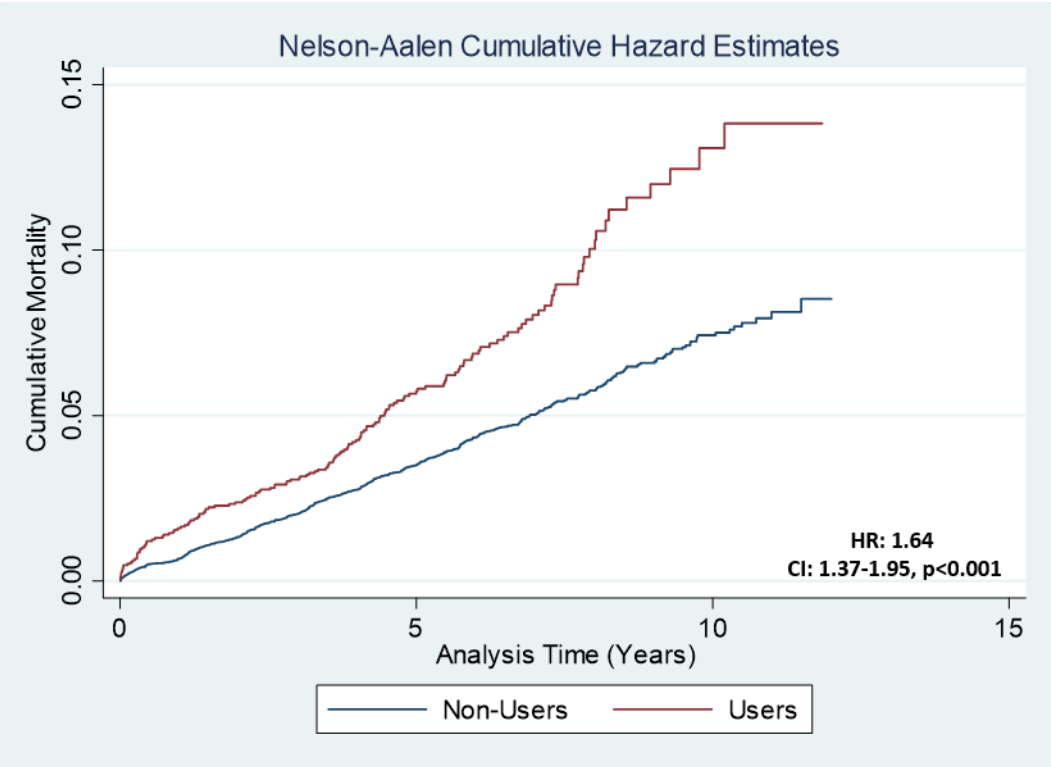

**Supplementary Table 3: Unadjusted and Adjusted Hazard Ratios for Mortality Associated with Statin Use in Unmatched Cohorts (Before Matching)**

| Follow-up Time    | Hazards Ratio | (95% CI)      | p value          |
|-------------------|---------------|---------------|------------------|
| <b>Unadjusted</b> |               |               |                  |
| 1 Year Follow-up  | 2.40          | (1.63 – 3.53) | <b>&lt;0.001</b> |
| 2 Year Follow-up  | 1.92          | (1.41 – 2.62) | <b>&lt;0.001</b> |
| 3 Year Follow-up  | 1.68          | (1.28 – 2.20) | <b>&lt;0.001</b> |
| Total Follow-up   | 1.64          | (1.37 – 1.95) | <b>&lt;0.001</b> |
| <b>Adjusted</b>   |               |               |                  |
| 1 Year Follow-up  | 0.69          | (0.44 – 1.07) | 0.104            |
| 2 Year Follow-up  | 0.69          | (0.48 – 0.99) | <b>0.044</b>     |
| 3 Year Follow-up  | 0.70          | (0.51 – 0.95) | <b>0.023</b>     |
| Total Follow-up   | 0.83          | (0.68 – 1.01) | 0.069            |

Note: Adjusted for age, gender, BMI, comorbidities and medication use
